# Supplementary material for: Peripheral immune characteristics of hepatitis B virus-related hepatocellular carcinoma
Source: PubMed Central journal article supplement (PMC10106696; doi:10.3389/fimmu.2023.1079495), 2023-04-03
Supplement: Presentation_1.pdf [file Presentation_1.pdf]

## Supplementary Figures and Tables

### Supplementary Figure 1.

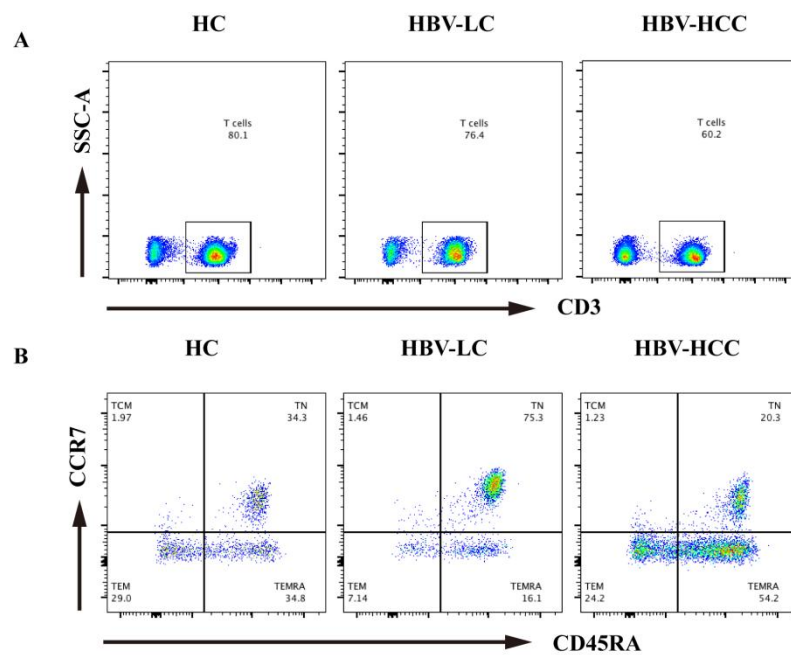

**Supplementary Figure 1. The example of flow cytometry scatter plot. (A)** The flow cytometry scatter plot of CD3<sup>+</sup> T cell. **(B)** The flow cytometry scatter plot of CD8<sup>+</sup>CCR7<sup>+</sup>CD45RA<sup>+</sup> T cell.

### Supplementary Figure 2.

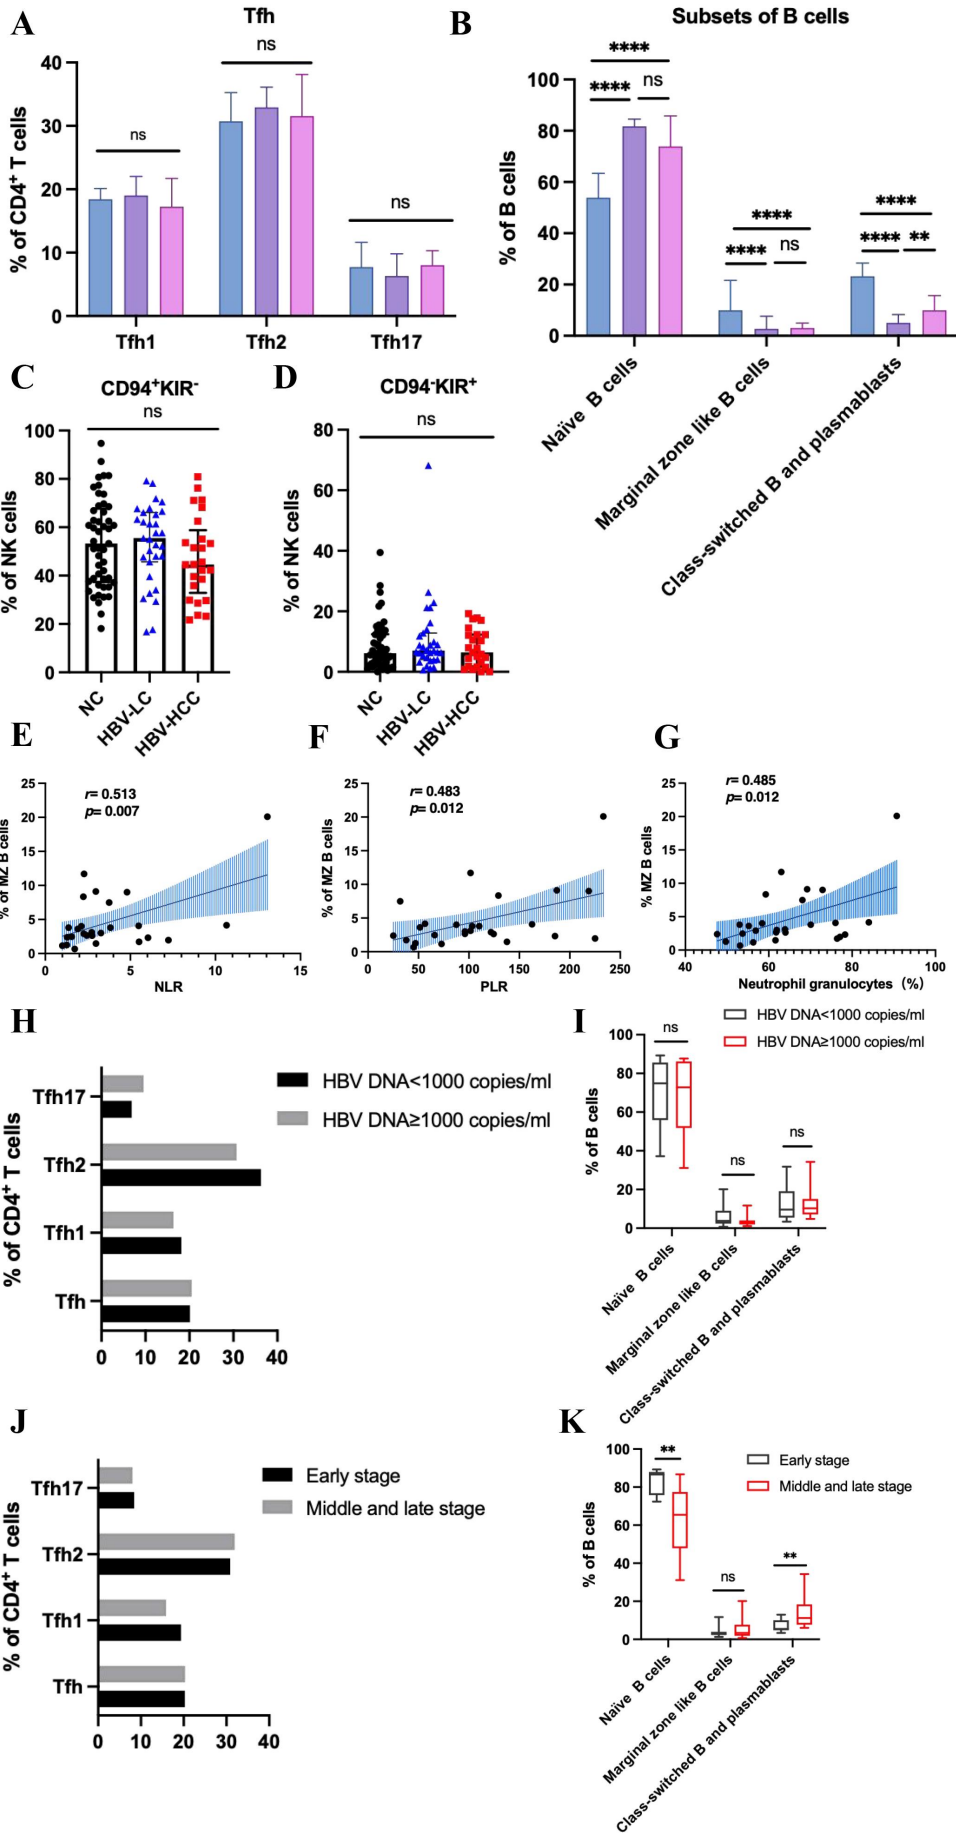

**Supplementary Figure 2.** (A) The frequency of Tfh1, Tfh2, Tfh17 cells. (B) The frequency of subsets of B cells. (C) The frequency of CD94<sup>+</sup>KIR<sup>-</sup> NK cells. (D) The frequency of CD94<sup>-</sup>KIR<sup>+</sup> NK cells. (E, F, G) The correlation of MZ B cells and inflammatory markers. (H) The frequency of Tfh, Tfh1, Tfh2, Tfh17 cells between two groups. (I) The frequency of subsets of B cells between two groups. (J) The frequency of subsets of Tfh, Tfh1, Tfh2, Tfh17 cells between two groups. (K) The frequency of subsets of B cells between two groups.

**Supplementary Figure 3.**

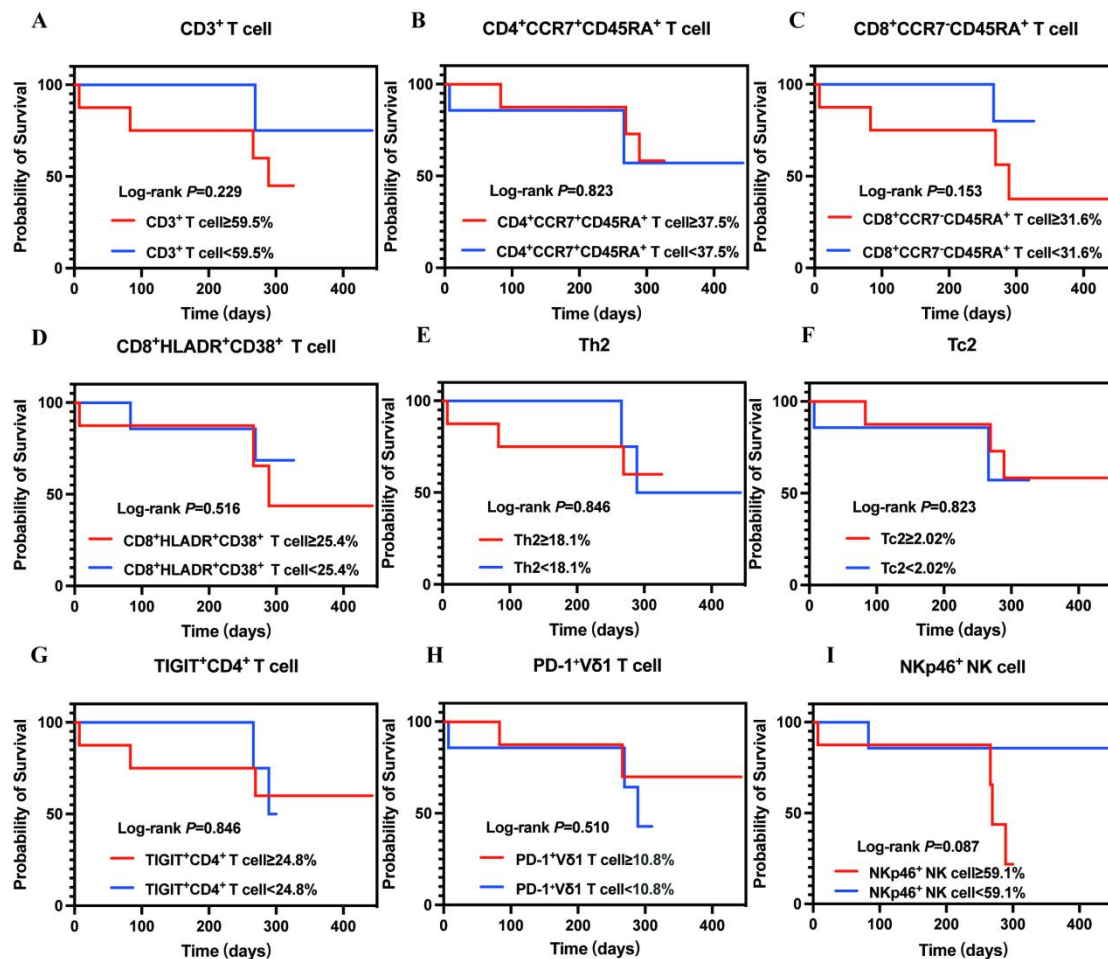

**Supplementary Figure 3. Kaplan–Meier curve analysis of immune cells as a predictor of overall survival in HBV-HCC.** (A) Kaplan–Meier curve analysis of CD3<sup>+</sup> T cell. (B) Kaplan–Meier curve analysis of CD4<sup>+</sup>CCR7<sup>+</sup>CD45RA<sup>+</sup> T cell. (C) Kaplan–Meier curve analysis of CD8<sup>+</sup>CCR7<sup>+</sup>CD45RA<sup>+</sup> T cell. (D) Kaplan–Meier

curve analysis of CD8<sup>+</sup>HLADR<sup>+</sup>CD38<sup>+</sup> T cell. (E) Kaplan–Meier curve analysis of Th2 cell. (F) Kaplan–Meier curve analysis of Tc2 cell. (G) Kaplan–Meier curve analysis of TIGIT<sup>+</sup>CD4<sup>+</sup> T cell. (H) Kaplan–Meier curve analysis of PD-1<sup>+</sup> Vδ1 T cell. (I) Kaplan–Meier curve analysis of NKp46<sup>+</sup> NK cell.

**Supplementary Table 1. List of fluorescence conjugated antibodies including clone number, Antibody article No and company.**

| Target   | Fluorochrome | Clone      | Art. No. | Company   |
|----------|--------------|------------|----------|-----------|
| CD3      | PerCP-Cy5.5  | UCHT1      | 560835   | BD        |
| CD3      | APC-H7       | SK7        | 560176   | BD        |
| CD4      | APC-H7       | RPA-T4     | 560158   | BD        |
| CD4      | PE-Cy7       | SK3        | 557852   | BD        |
| CD8      | FITC         | RPA-T8     | 301050   | Biolegend |
| CD8      | BV510        | SK1        | 563919   | BD        |
| CD8      | PerCP-Cy5.5  | SK1        | 565310   | BD        |
| CD28     | PE-Cy7       | CD28.2     | 560684   | BD        |
| CD25     | PE           | M-A251     | 555432   | BD        |
| CD45RA   | FITC         | HI100      | 555488   | BD        |
| CCR7     | Alexa 647    | 150503     | 560816   | BD        |
| CD127    | BV421        | HIL-7R-M21 | 562436   | BD        |
| CD57     | BV421        | NK-1       | 563896   | BD        |
| PD-1     | Alexa 647    | EH12.1     | 560838   | BD        |
| PD-1     | FITC         | EH12.2H7   | 329904   | Biolegend |
| PD-1     | BV605        | EH12.2H7   | 329924   | Biolegend |
| HLA-DR   | PE           | G46-6      | 555812   | BD        |
| CD38     | BV510        | HIT2       | 563251   | BD        |
| CD38     | APC          | HIT2       | 555462   | BD        |
| CD45     | APC-Cy7      | HI30       | 304014   | Biolegend |
| CD19     | PerCP-Cy5.5  | HIB19      | 561295   | BD        |
| IgM      | BV510        | G20-127    | 563113   | BD        |
| IgD      | BB515        | IA6-2      | 565243   | BD        |
| CD27     | BV421        | M-T271     | 562513   | BD        |
| CD21     | PE-Cy7       | B-1Y4      | 561374   | BD        |
| CD56     | APC          | 5.1H11     | 362504   | Biolegend |
| CD94     | PerCP-Cy5.5  | HP-3D9     | 562361   | BD        |
| KIR/NKB1 | PE           | DX9        | 555967   | BD        |
| NKG2D    | PE-Cy7       | 1D11       | 562365   | BD        |
| NKP30    | Alexa 647    | p30-15     | 325212   | Biolegend |
| NKP30    | BV421        | p30-15     | 563385   | BD        |

|                                  |                     |                  |                    |                        |
|----------------------------------|---------------------|------------------|--------------------|------------------------|
| <b>NKP46</b>                     | <b>BV510</b>        | <b>9E2/NKp46</b> | <b>564064</b>      | <b>BD</b>              |
| <b><math>\gamma\delta</math></b> | <b>BV421</b>        | <b>11F2</b>      | <b>624336</b>      | <b>BD</b>              |
| <b>TCR V<math>\delta</math>1</b> | <b>PerCP-vio700</b> | <b>REA173</b>    | <b>130-120-441</b> | <b>Miltenyi Biotec</b> |
| <b>TCR V<math>\delta</math>2</b> | <b>PE</b>           | <b>B6</b>        | <b>555739</b>      | <b>BD</b>              |
| <b>TCR V<math>\delta</math>2</b> | <b>BV510</b>        | <b>B6</b>        | <b>331432</b>      | <b>Biolegend</b>       |
| <b>LAG3</b>                      | <b>APC-R700</b>     | <b>T47-530</b>   | <b>565774</b>      | <b>BD</b>              |
| <b>TIM3</b>                      | <b>APC</b>          | <b>F38-2E2</b>   | <b>345012</b>      | <b>Biolegend</b>       |
| <b>TIGIT</b>                     | <b>BV421</b>        | <b>741182</b>    | <b>747844</b>      | <b>BD</b>              |
